# Supplementary material
Source: Springer Nature journal article supplement (https://www.springermedizin.de/resource/supplementary/13024_2014_545_MOESM2_ESM.pdf/9644368)
Supplement: MOESM2 [file 9644368]

| GeneName      | Probe Name    | CORTEX |       |       | HIPPOCAMPUS |       |       |
|---------------|---------------|--------|-------|-------|-------------|-------|-------|
|               |               | M4     | M6    | M9    | M4          | M6    | M9    |
| Dhx36         | A_51_P148959  | -1.60  | -1.54 | -1.75 | -1.70       | -1.45 | -1.64 |
| Gmps          | A_55_P2185323 | -1.86  | -2.26 | -2.08 | -2.19       | -1.67 | -2.79 |
| Rec8          | A_51_P246677  | -1.97  | -2.38 | -2.45 | -1.95       | -2.14 | -2.05 |
| 5430435G22Rik | A_55_P2082989 | 2.00   | 1.65  | 4.41  | 2.88        | 2.61  | 4.12  |
| 5730416F02Rik | A_52_P110070  | 2.03   | 1.83  | 1.77  | 1.90        | 1.51  | 1.81  |
| Abi3          | A_51_P185906  | 2.32   | 2.75  | 3.23  | 2.65        | 2.95  | 3.09  |
| Adora3        | A_55_P1972605 | 1.66   | 1.89  | 1.47  | 2.19        | 1.95  | 2.60  |
| Agpat2        | A_55_P1970810 | 1.45   | 1.60  | 1.47  | 1.48        | 1.62  | 1.94  |
| AI646519      | A_55_P2359610 | 1.71   | 1.66  | 1.78  | 1.92        | 1.61  | 2.07  |
| Aif1          | A_51_P400543  | 2.15   | 2.44  | 2.18  | 2.46        | 2.28  | 2.91  |
| Ang           | A_51_P391159  | 1.53   | 1.45  | 1.74  | 1.98        | 2.27  | 1.49  |
| Anxa3         | A_55_P2056325 | 1.83   | 1.63  | 1.75  | 1.80        | 1.57  | 2.43  |
| Apbb1ip       | A_55_P1961009 | 1.83   | 1.79  | 2.11  | 2.72        | 2.71  | 2.91  |
| Arhgap9       | A_55_P2091551 | 2.00   | 2.52  | 2.14  | 2.37        | 2.70  | 3.27  |
| Arpc1b        | A_55_P2023076 | 1.78   | 2.07  | 2.57  | 1.88        | 1.55  | 3.86  |
| Asb10         | A_55_P2044710 | 2.25   | 1.52  | 2.80  | 2.64        | 4.01  | 2.32  |
| Aspg          | A_52_P338956  | 2.00   | 2.96  | 2.85  | 3.25        | 4.34  | 5.23  |
| Atf3          | A_52_P452689  | 2.24   | 2.62  | 2.08  | 1.81        | 3.84  | 2.45  |
| B2m           | A_51_P129012  | 1.74   | 1.63  | 2.54  | 1.78        | 2.45  | 2.45  |
| B2m           | A_51_P129012  | 1.66   | 1.66  | 2.74  | 1.64        | 2.75  | 2.53  |
| Bcl3          | A_55_P2066116 | 2.10   | 3.05  | 3.70  | 2.87        | 3.73  | 5.85  |
| Bcl2a1c       | A_52_P299771  | 2.78   | 2.48  | 3.21  | 2.43        | 4.43  | 3.64  |
| Bst2          | A_51_P169693  | 2.45   | 2.47  | 3.59  | 1.59        | 2.67  | 3.92  |
| C1qa          | A_51_P181451  | 2.65   | 3.25  | 3.98  | 3.02        | 3.84  | 4.68  |
| C1qb          | A_51_P351860  | 2.32   | 2.95  | 3.20  | 2.63        | 5.14  | 2.92  |
| C1qc          | A_51_P102789  | 2.83   | 2.00  | 5.67  | 3.03        | 4.58  | 4.20  |
| C1qc          | A_51_P102789  | 2.60   | 2.12  | 5.66  | 2.86        | 4.22  | 4.16  |
| C1qc          | A_51_P102789  | 2.56   | 2.07  | 5.52  | 2.82        | 4.47  | 4.27  |
| C1qc          | A_51_P102789  | 2.53   | 2.30  | 5.50  | 2.88        | 4.52  | 4.74  |
| C1qc          | A_51_P102789  | 2.60   | 2.21  | 5.66  | 2.85        | 4.13  | 4.63  |
| C1qc          | A_51_P102789  | 2.52   | 2.22  | 5.59  | 3.06        | 4.00  | 4.52  |
| C1qc          | A_51_P102789  | 2.55   | 2.32  | 5.58  | 2.91        | 4.12  | 4.51  |
| C1qc          | A_51_P102789  | 2.53   | 2.18  | 5.47  | 2.99        | 3.97  | 4.29  |
| C1qc          | A_51_P102789  | 2.58   | 1.97  | 5.75  | 2.97        | 5.40  | 4.12  |
| C1qc          | A_51_P102789  | 2.64   | 2.03  | 5.53  | 2.89        | 4.20  | 4.12  |
| C3ar1         | A_51_P282557  | 2.15   | 1.96  | 2.88  | 2.13        | 5.69  | 2.96  |
| Capg          | A_55_P1998631 | 2.57   | 2.15  | 3.66  | 2.78        | 2.71  | 3.85  |
| Ccl4          | A_51_P509573  | 8.97   | 7.31  | 9.91  | 12.71       | 10.67 | 11.32 |
| Ccl6          | A_51_P460954  | 12.44  | 9.41  | 13.37 | 13.66       | 10.81 | 9.74  |
| Cd9           | A_51_P320852  | 1.79   | 1.83  | 2.41  | 1.69        | 1.59  | 2.58  |
| Cd14          | A_51_P172853  | 2.74   | 3.20  | 3.82  | 2.57        | 3.63  | 3.30  |
| Cd37          | A_55_P2118570 | 2.31   | 2.09  | 3.18  | 2.16        | 2.71  | 2.74  |
| Cd37          | A_55_P2174490 | 1.98   | 1.96  | 2.90  | 1.90        | 4.28  | 2.09  |
| Cd48          | A_55_P2185605 | 2.21   | 2.74  | 2.46  | 2.45        | 3.43  | 3.74  |

|               |               |       |       |        |        |        |        |
|---------------|---------------|-------|-------|--------|--------|--------|--------|
| Cd48          | A_55_P2132549 | 1.86  | 2.37  | 3.00   | 2.10   | 3.46   | 2.79   |
| Cd52          | A_51_P151126  | 5.00  | 5.76  | 9.37   | 6.84   | 6.34   | 9.90   |
| Cd68          | A_55_P1961943 | 5.21  | 3.01  | 10.46  | 5.78   | 6.19   | 7.20   |
| Cd84          | A_55_P2054445 | 3.10  | 3.08  | 2.79   | 2.89   | 2.88   | 4.31   |
| Cd86          | A_55_P1971951 | 1.78  | 2.31  | 2.50   | 2.51   | 3.05   | 3.51   |
| Cd300lf       | A_55_P2081164 | 2.34  | 4.71  | 3.00   | 2.51   | 5.35   | 3.80   |
| Cd300lf       | A_52_P422494  | 2.27  | 3.84  | 2.72   | 2.70   | 4.80   | 3.18   |
| Cebpa         | A_52_P168567  | 2.09  | 1.66  | 2.66   | 1.90   | 2.08   | 1.87   |
| Ch25h         | A_55_P2008987 | 2.58  | 2.61  | 4.10   | 3.68   | 3.65   | 4.68   |
| Clec7a        | A_51_P246653  | 12.10 | 34.95 | 30.86  | 15.93  | 32.21  | 32.47  |
| Col16a1       | A_55_P2124751 | 1.21  | 1.95  | 1.36   | 2.03   | 1.56   | 2.09   |
| Col16a1       | A_55_P2056739 | 1.63  | 2.18  | 1.79   | 2.07   | 2.07   | 1.88   |
| Csf1          | A_51_P195506  | 1.58  | 1.63  | 1.86   | 1.44   | 1.69   | 2.16   |
| Csf1          | A_51_P195506  | 1.47  | 1.46  | 1.93   | 1.48   | 1.56   | 2.01   |
| Csf1          | A_51_P195506  | 1.54  | 1.44  | 1.72   | 1.42   | 1.62   | 1.99   |
| Csf1          | A_51_P195506  | 1.48  | 1.62  | 1.95   | 1.56   | 1.39   | 2.17   |
| Csf1          | A_51_P195506  | 1.55  | 1.61  | 1.97   | 1.70   | 1.40   | 2.22   |
| Csf1          | A_51_P195506  | 1.40  | 1.50  | 1.83   | 1.38   | 1.56   | 2.02   |
| Csf1          | A_51_P195506  | 1.44  | 1.73  | 1.82   | 1.35   | 1.53   | 2.50   |
| Csf1          | A_51_P195506  | 1.47  | 1.54  | 1.76   | 1.49   | 1.50   | 2.09   |
| Csf1          | A_51_P195506  | 1.46  | 1.63  | 1.81   | 1.51   | 1.42   | 2.24   |
| Csf1          | A_51_P195506  | 1.52  | 1.55  | 1.87   | 1.48   | 1.48   | 2.22   |
| Csf1r         | A_52_P602091  | 2.17  | 2.47  | 1.68   | 1.84   | 2.40   | 2.07   |
| Csf1r         | A_55_P2025078 | 1.83  | 1.88  | 1.89   | 2.19   | 1.70   | 2.51   |
| Csf1r         | A_55_P2025073 | 1.42  | 1.40  | 1.26   | 1.30   | 1.71   | 1.03   |
| Csf2rb        | A_52_P52618   | 2.12  | 2.07  | 2.26   | 2.02   | 2.41   | 3.06   |
| Cst7          | A_51_P137419  | 74.71 | 63.46 | 140.15 | 100.48 | 118.36 | 145.84 |
| Ctsa          | A_55_P1955841 | 1.50  | 1.69  | 1.74   | 1.75   | 1.20   | 2.07   |
| Ctsc          | A_52_P195839  | 1.95  | 1.94  | 1.96   | 1.77   | 2.07   | 2.40   |
| Ctsd          | A_51_P384629  | 3.04  | 3.02  | 3.79   | 3.23   | 3.08   | 3.48   |
| Ctsd          | A_65_P13209   | 2.97  | 4.44  | 2.41   | 2.83   | 3.72   | 3.14   |
| Ctsh          | A_52_P51078   | 1.85  | 1.52  | 1.66   | 2.01   | 1.94   | 2.11   |
| Ctss          | A_55_P2024888 | 3.03  | 3.32  | 2.88   | 3.40   | 3.75   | 4.04   |
| Ctsz          | A_51_P256202  | 2.71  | 3.02  | 3.85   | 3.02   | 3.78   | 4.33   |
| Cx3cr1        | A_52_P99810   | 1.99  | 1.01  | 3.01   | 2.10   | 2.64   | 2.00   |
| Cx3cr1        | A_55_P2007964 | 1.98  | 1.64  | 1.61   | 2.16   | 2.03   | 2.30   |
| Cxcl10        | A_55_P2016462 | 2.86  | 3.42  | 3.02   | 2.50   | 3.77   | 5.35   |
| Cyba          | A_55_P1979341 | 3.08  | 2.72  | 4.63   | 2.69   | 2.44   | 4.68   |
| Cyba          | A_51_P131800  | 2.33  | 1.57  | 3.73   | 2.38   | 2.37   | 3.05   |
| Cyth4         | A_55_P2113210 | 2.03  | 2.13  | 2.57   | 1.79   | 1.47   | 2.42   |
| Emr1          | A_55_P2018934 | 1.52  | 1.26  | 1.62   | 1.61   | 2.02   | 1.85   |
| Emr1          | A_55_P2144386 | 1.61  | 1.57  | 1.40   | 1.93   | 1.68   | 2.37   |
| F420015M19Rik | A_55_P2041584 | 1.63  | -1.55 | 3.13   | 2.15   | 1.47   | 2.03   |
| Fam167b       | A_52_P326657  | 1.52  | 1.49  | 1.89   | 2.20   | 1.97   | 1.89   |
| Fam46c        | A_51_P447976  | 2.92  | 2.77  | 4.88   | 3.69   | 2.40   | 5.96   |
| Fblim1        | A_55_P2038757 | 1.47  | 1.51  | 2.61   | 1.59   | 4.68   | 2.78   |

|         |               |      |      |       |      |       |      |
|---------|---------------|------|------|-------|------|-------|------|
| Fcer1g  | A_51_P405476  | 3.28 | 2.42 | 5.04  | 3.57 | 3.98  | 3.83 |
| Fcgr2b  | A_51_P130095  | 1.60 | 1.67 | 3.82  | 1.97 | 3.38  | 4.16 |
| Fcgr2b  | A_51_P130095  | 1.58 | 1.69 | 3.46  | 2.35 | 3.07  | 5.25 |
| Fcgr2b  | A_51_P130095  | 1.52 | 1.68 | 3.48  | 2.32 | 2.41  | 5.58 |
| Fcgr2b  | A_51_P130095  | 1.42 | 1.70 | 3.90  | 2.50 | 2.14  | 6.25 |
| Fcgr2b  | A_51_P130095  | 1.52 | 1.79 | 3.73  | 1.95 | 3.29  | 5.97 |
| Fcgr2b  | A_51_P130095  | 1.54 | 1.51 | 3.93  | 2.19 | 2.57  | 4.97 |
| Fcgr2b  | A_51_P130095  | 1.54 | 1.85 | 3.56  | 1.76 | 3.96  | 5.48 |
| Fcgr2b  | A_51_P130095  | 1.46 | 1.67 | 3.00  | 2.41 | 3.34  | 4.86 |
| Fcgr2b  | A_51_P130095  | 1.55 | 1.59 | 3.05  | 2.22 | 3.03  | 5.27 |
| Fcgr2b  | A_51_P130095  | 1.44 | 1.66 | 3.69  | 2.72 | 2.80  | 4.72 |
| Fes     | A_52_P365011  | 2.05 | 1.91 | 1.90  | 1.88 | 2.13  | 1.96 |
| Fes     | A_52_P635338  | 1.96 | 2.38 | 2.22  | 2.66 | 1.95  | 3.13 |
| Fyb     | A_55_P2006869 | 1.75 | 2.15 | 1.83  | 1.63 | 1.54  | 2.75 |
| Gal3st2 | A_55_P2026547 | 1.76 | 1.89 | 1.86  | 2.01 | 1.48  | 2.65 |
| Gfap    | A_55_P2157245 | 3.37 | 6.08 | 4.36  | 2.20 | 2.97  | 5.37 |
| Gfap    | A_52_P52303   | 5.16 | 8.37 | 5.01  | 2.85 | 3.12  | 4.46 |
| Gfap    | A_55_P2157250 | 8.08 | 8.58 | 11.81 | 3.99 | 7.98  | 3.50 |
| Glipr1  | A_51_P371051  | 1.98 | 1.77 | 1.54  | 1.47 | 1.66  | 1.56 |
| Gm5637  | A_55_P2166555 | 2.14 | 2.07 | 2.60  | 2.27 | 2.07  | 2.92 |
| Gngt2   | A_55_P2151986 | 1.83 | 1.77 | 3.02  | 2.62 | 2.32  | 3.46 |
| Gpnmb   | A_51_P438967  | 1.76 | 3.44 | 2.37  | 1.97 | 5.68  | 3.70 |
| Gpr34   | A_55_P2039684 | 1.98 | 1.92 | 2.12  | 2.36 | 2.05  | 2.63 |
| Gpr65   | A_51_P108459  | 2.30 | 2.92 | 2.67  | 2.28 | 2.75  | 3.50 |
| Gpr65   | A_51_P108459  | 2.34 | 2.54 | 2.76  | 1.86 | 2.10  | 3.19 |
| Gpr65   | A_51_P108459  | 2.74 | 1.37 | 2.75  | 2.51 | 2.95  | 2.01 |
| Gpr65   | A_51_P108459  | 2.89 | 2.96 | 2.89  | 2.87 | 2.84  | 4.53 |
| Gpr65   | A_51_P108459  | 2.54 | 3.34 | 2.64  | 2.44 | 3.13  | 4.62 |
| Gpr65   | A_51_P108459  | 2.49 | 3.17 | 2.48  | 2.11 | 1.92  | 3.97 |
| Gpr65   | A_51_P108459  | 2.69 | 2.92 | 2.64  | 2.81 | -1.38 | 3.49 |
| Gpr65   | A_51_P108459  | 2.44 | 3.05 | 2.61  | 2.96 | 2.88  | 3.51 |
| Gpr65   | A_51_P108459  | 2.13 | 2.72 | 2.41  | 1.84 | 2.70  | 3.09 |
| Gpr65   | A_51_P108459  | 2.61 | 2.79 | 2.44  | 2.67 | 2.75  | 3.61 |
| Gpr84   | A_55_P2044932 | 2.78 | 2.85 | 3.78  | 3.10 | 2.22  | 5.77 |
| Gpsm3   | A_55_P1957633 | 1.79 | 1.49 | 2.47  | 1.83 | 1.90  | 2.10 |
| Grn     | A_51_P192800  | 2.55 | 2.33 | 2.64  | 2.20 | 3.03  | 2.47 |
| Gsdmd   | A_51_P172231  | 1.25 | 1.62 | 1.58  | 1.38 | 2.04  | 1.60 |
| Gsdmd   | A_51_P172231  | 1.45 | 1.71 | 1.54  | 1.26 | 2.16  | 1.51 |
| Gsdmd   | A_51_P172231  | 1.32 | 1.66 | 1.54  | 1.44 | 1.76  | 1.68 |
| Gsdmd   | A_51_P172231  | 1.63 | 1.74 | 1.62  | 1.45 | 2.21  | 1.82 |
| Gsdmd   | A_51_P172231  | 1.48 | 1.88 | 1.61  | 1.34 | 2.21  | 1.83 |
| Gsdmd   | A_51_P172231  | 1.43 | 1.59 | 1.67  | 1.42 | 2.20  | 1.87 |
| Gsdmd   | A_51_P172231  | 1.43 | 1.75 | 1.64  | 1.37 | 2.84  | 1.84 |
| Gsdmd   | A_51_P172231  | 1.54 | 1.77 | 1.39  | 1.62 | 1.73  | 1.85 |
| Gsdmd   | A_51_P172231  | 1.51 | 1.92 | 1.50  | 1.52 | 2.24  | 1.57 |
| Gsdmd   | A_51_P172231  | 1.47 | 1.66 | 1.45  | 1.33 | 1.86  | 1.66 |

|        |               |      |       |      |      |      |       |
|--------|---------------|------|-------|------|------|------|-------|
| Gusb   | A_51_P211491  | 2.49 | 3.17  | 3.24 | 3.05 | 3.61 | 3.89  |
| Gusb   | A_51_P211491  | 2.92 | 2.90  | 2.85 | 2.93 | 3.07 | 3.64  |
| Gusb   | A_51_P211491  | 2.67 | 3.41  | 3.30 | 3.09 | 3.30 | 4.19  |
| Gusb   | A_51_P211491  | 2.55 | 3.46  | 3.16 | 3.14 | 2.76 | 3.82  |
| Gusb   | A_51_P211491  | 2.80 | 3.38  | 3.33 | 2.88 | 2.67 | 4.20  |
| Gusb   | A_51_P211491  | 2.72 | 3.04  | 3.11 | 2.83 | 2.85 | 3.54  |
| Gusb   | A_51_P211491  | 2.62 | 3.56  | 3.14 | 3.09 | 2.96 | 4.59  |
| Gusb   | A_51_P211491  | 2.77 | 3.42  | 3.17 | 2.96 | 3.26 | 4.13  |
| Gusb   | A_52_P160936  | 1.33 | 1.45  | 1.54 | 1.63 | 1.32 | 2.00  |
| Gusb   | A_51_P211491  | 2.66 | 2.95  | 3.33 | 3.12 | 3.42 | 3.80  |
| Gusb   | A_51_P211491  | 2.73 | 3.41  | 3.11 | 2.98 | 2.98 | 3.90  |
| H2-M2  | A_51_P191463  | 1.54 | 1.31  | 1.51 | 1.44 | 3.51 | -1.08 |
| H2-M2  | A_51_P191463  | 1.11 | 1.70  | 1.47 | 1.33 | 2.70 | 1.41  |
| H2-M2  | A_51_P191463  | 1.24 | 1.42  | 1.55 | 1.46 | 2.60 | 1.63  |
| H2-M2  | A_51_P191463  | 1.54 | 1.29  | 1.53 | 1.55 | 2.42 | 1.60  |
| H2-M2  | A_51_P191463  | 1.48 | 1.41  | 1.28 | 1.37 | 2.56 | 1.51  |
| H2-M2  | A_51_P191463  | 1.55 | 1.21  | 1.59 | 1.37 | 2.76 | 1.49  |
| H2-M2  | A_51_P191463  | 1.35 | 1.35  | 1.57 | 1.25 | 2.62 | 1.34  |
| H2-M2  | A_51_P191463  | 1.40 | 1.42  | 1.43 | 1.53 | 3.10 | 1.33  |
| H2-M2  | A_51_P191463  | 1.37 | 1.24  | 1.34 | 1.32 | 2.57 | 1.35  |
| H2-M2  | A_51_P191463  | 1.05 | 1.29  | 1.80 | 1.37 | 2.69 | 1.36  |
| H2-Q8  | A_55_P1978465 | 2.03 | 3.34  | 2.68 | 1.51 | 5.38 | 3.35  |
| Haa0   | A_55_P2074035 | 2.04 | 1.51  | 1.86 | 1.50 | 1.57 | 1.50  |
| Havcr2 | A_55_P1965659 | 2.14 | 2.41  | 2.75 | 2.75 | 2.09 | 2.89  |
| Hcls1  | A_51_P297679  | 2.08 | 2.50  | 2.33 | 2.29 | 2.27 | 3.37  |
| Hcst   | A_55_P1984886 | 1.85 | 1.84  | 3.68 | 2.90 | 2.26 | 3.69  |
| Hexa   | A_51_P282667  | 1.90 | 2.01  | 2.31 | 1.72 | 2.33 | 2.39  |
| Hexb   | A_51_P453111  | 2.49 | 2.04  | 3.20 | 2.81 | 2.04 | 3.28  |
| Hk2    | A_51_P204080  | 1.68 | 1.81  | 2.06 | 1.52 | 2.53 | 2.40  |
| Hmha1  | A_55_P2002103 | 2.01 | 2.58  | 2.36 | 2.51 | 2.09 | 3.16  |
| Hspb6  | A_55_P2039289 | 1.55 | 1.45  | 2.08 | 1.60 | 1.58 | 1.74  |
| Hvcn1  | A_55_P2025008 | 2.76 | 3.22  | 3.72 | 2.83 | 2.92 | 3.95  |
| Hvcn1  | A_55_P1960053 | 2.72 | 3.93  | 4.07 | 2.87 | 3.36 | 4.51  |
| Igf1   | A_55_P2085979 | 1.42 | -1.24 | 1.04 | 1.06 | 1.30 | -1.39 |
| Igf1   | A_55_P2085984 | 2.70 | 2.42  | 3.72 | 3.22 | 2.84 | 5.41  |
| Igf1   | A_55_P2085984 | 2.53 | 2.13  | 5.02 | 3.85 | 2.86 | 5.35  |
| Igf1   | A_55_P2031636 | 1.17 | 1.01  | 1.16 | 1.03 | 1.58 | 1.50  |
| Igf1   | A_55_P2031631 | 2.98 | 2.48  | 4.57 | 2.96 | 2.77 | 5.27  |
| Igf1   | A_55_P2031631 | 2.59 | 1.97  | 5.09 | 3.06 | 2.99 | 4.22  |
| Igsf6  | A_51_P258372  | 1.64 | 1.81  | 1.85 | 1.95 | 1.76 | 2.55  |
| Ikzf1  | A_66_P124139  | 1.33 | 1.35  | 1.29 | 1.76 | 1.71 | 1.79  |
| Ikzf1  | A_55_P2023607 | 1.47 | 1.55  | 1.76 | 2.09 | 1.75 | 2.56  |
| Il3ra  | A_55_P2008181 | 1.79 | 2.21  | 2.12 | 1.85 | 1.82 | 2.12  |
| Inpp5d | A_51_P337125  | 1.67 | 1.87  | 2.00 | 2.11 | 1.99 | 3.47  |
| Irf5   | A_51_P346668  | 2.06 | 2.03  | 2.06 | 2.30 | 1.77 | 2.10  |
| Irf8   | A_52_P354823  | 3.17 | 3.20  | 4.29 | 3.70 | 3.96 | 4.24  |

|         |               |       |       |       |       |       |       |
|---------|---------------|-------|-------|-------|-------|-------|-------|
| Itgax   | A_51_P303424  | 16.29 | 13.43 | 19.61 | 16.11 | 14.83 | 23.20 |
| Itgb2   | A_51_P262208  | 2.47  | 2.65  | 3.39  | 2.35  | 2.38  | 2.87  |
| Itgb5   | A_51_P327796  | 2.01  | 1.62  | 2.68  | 1.87  | 1.73  | 2.45  |
| Kcne2   | A_55_P1979242 | 3.69  | 1.49  | -1.63 | 1.69  | -2.03 | 3.19  |
| Klhl6   | A_51_P433615  | 2.07  | 2.69  | 1.56  | 1.66  | 2.11  | 2.75  |
| Krt85   | A_55_P1999364 | 2.62  | 3.10  | 5.40  | 2.58  | 3.36  | 3.78  |
| Lag3    | A_51_P264825  | 2.84  | 2.27  | 3.64  | 2.73  | 4.53  | 3.21  |
| Lair1   | A_55_P1991214 | 1.63  | 1.38  | 2.36  | 2.13  | 2.13  | 2.46  |
| Lat2    | A_51_P242930  | 1.72  | 1.94  | 2.20  | 1.86  | 2.39  | 1.97  |
| Lcp1    | A_55_P2066613 | 1.41  | 1.21  | 2.52  | 2.62  | 2.35  | 3.11  |
| Lcp1    | A_52_P56751   | 1.74  | 1.88  | 1.63  | 1.91  | 2.09  | 2.40  |
| Lgals3  | A_55_P2171116 | 1.91  | 2.96  | 4.24  | 1.79  | 2.73  | 5.69  |
| Lsp1    | A_55_P1957413 | 1.85  | 2.10  | 2.34  | 2.26  | 2.45  | 3.28  |
| Ly86    | A_51_P465350  | 3.55  | 4.47  | 4.02  | 4.15  | 4.41  | 4.71  |
| Lyl1    | A_51_P143190  | 1.51  | 1.66  | 1.94  | 1.61  | 1.71  | 2.11  |
| Man2b1  | A_51_P336161  | 2.20  | 2.43  | 2.17  | 2.16  | 2.27  | 2.53  |
| Mlph    | A_66_P132222  | 1.61  | 2.29  | 1.72  | 1.93  | 2.48  | 1.59  |
| Mlxip1  | A_55_P2119957 | 2.22  | 2.52  | 2.22  | 2.56  | 2.74  | 2.45  |
| Mpeg1   | A_51_P390538  | 5.58  | 5.52  | 6.06  | 7.74  | 7.35  | 8.19  |
| Myo1f   | A_66_P112305  | 2.32  | 2.79  | 3.30  | 3.64  | 2.68  | 4.98  |
| Myo1f   | A_55_P2124273 | 2.59  | 3.59  | 3.20  | 2.95  | 4.26  | 3.19  |
| Naglu   | A_52_P504361  | 2.07  | 2.06  | 2.17  | 1.66  | 2.24  | 2.03  |
| Naip2   | A_55_P1984243 | 2.20  | 2.80  | 2.37  | 2.12  | 2.21  | 3.19  |
| Naprt1  | A_51_P414115  | 1.64  | 1.75  | 1.76  | 1.54  | 1.48  | 1.57  |
| Ncf2    | A_55_P2184189 | 1.77  | 2.09  | 2.71  | 2.51  | 3.28  | 3.31  |
| Ncf4    | A_51_P377452  | 2.09  | 2.09  | 2.11  | 2.36  | 1.76  | 3.12  |
| Nckap1l | A_51_P119429  | 1.95  | 2.20  | 2.11  | 2.43  | 1.66  | 3.22  |
| Nckap1l | A_51_P119429  | 1.89  | 2.12  | 2.16  | 2.27  | 1.72  | 2.66  |
| Nckap1l | A_51_P119429  | 1.83  | 1.82  | 2.03  | 2.31  | 1.61  | 2.68  |
| Nckap1l | A_51_P119429  | 1.93  | 2.08  | 2.11  | 2.64  | 1.55  | 2.68  |
| Nckap1l | A_51_P119429  | 1.79  | 1.93  | 1.96  | 2.60  | 1.93  | 2.79  |
| Nckap1l | A_51_P119429  | 1.70  | 2.18  | 1.88  | 2.31  | 1.63  | 2.83  |
| Nckap1l | A_51_P119429  | 1.85  | 1.94  | 2.13  | 2.38  | 1.96  | 2.75  |
| Nckap1l | A_51_P119429  | 1.86  | 2.10  | 1.86  | 2.22  | 2.27  | 2.85  |
| Nckap1l | A_51_P119429  | 1.89  | 2.17  | 2.02  | 2.57  | 1.85  | 2.94  |
| Nckap1l | A_51_P119429  | 1.71  | 1.98  | 1.89  | 2.39  | 1.80  | 2.76  |
| Npc2    | A_51_P347961  | 1.85  | 2.27  | 1.96  | 1.63  | 1.99  | 2.51  |
| Olfml3  | A_51_P191782  | 2.24  | 1.92  | 1.87  | 2.00  | 1.90  | 1.62  |
| Osmr    | A_51_P319460  | 1.65  | 2.71  | 3.06  | 2.47  | 3.05  | 5.29  |
| P2ry6   | A_51_P105124  | 2.45  | 1.61  | 1.96  | 1.70  | 1.71  | 2.44  |
| P2ry6   | A_51_P105124  | 1.70  | 1.96  | 2.03  | 2.15  | 1.93  | 2.38  |
| P2ry6   | A_51_P105124  | 1.87  | 2.06  | 2.09  | 1.96  | 1.82  | 2.43  |
| P2ry6   | A_51_P105124  | 1.89  | 1.80  | 2.21  | 1.80  | 1.97  | 2.55  |
| P2ry6   | A_51_P105124  | 1.65  | 1.80  | 2.17  | 2.08  | 1.99  | 2.42  |
| P2ry6   | A_51_P105124  | 1.78  | 1.71  | 1.94  | 2.03  | 2.18  | 2.33  |
| P2ry6   | A_51_P105124  | 1.74  | 1.66  | 2.05  | 1.99  | 1.74  | 2.43  |

|          |               |      |      |      |      |      |      |
|----------|---------------|------|------|------|------|------|------|
| P2ry6    | A_51_P105124  | 1.57 | 1.84 | 2.15 | 1.99 | 2.02 | 2.44 |
| P2ry6    | A_51_P105124  | 1.76 | 1.97 | 2.15 | 2.06 | 1.90 | 2.52 |
| P2ry6    | A_51_P105124  | 1.77 | 1.74 | 2.22 | 2.17 | 1.75 | 2.59 |
| Pdcd1    | A_51_P285736  | 2.82 | 2.43 | 4.02 | 3.33 | 2.22 | 3.48 |
| Plcg2    | A_51_P279163  | 1.68 | 1.92 | 1.89 | 1.61 | 1.96 | 2.38 |
| Pld4     | A_52_P591153  | 1.97 | 2.32 | 1.62 | 2.12 | 2.69 | 1.59 |
| Plek     | A_55_P1966194 | 2.15 | 2.76 | 2.63 | 2.99 | 3.14 | 4.18 |
| Pon3     | A_51_P256665  | 2.12 | 2.16 | 2.82 | 2.12 | 1.98 | 3.61 |
| Psmb8    | A_51_P345367  | 2.27 | 2.17 | 2.56 | 1.96 | 3.58 | 2.67 |
| Ptpn6    | A_52_P114722  | 2.60 | 3.15 | 3.47 | 2.99 | 2.76 | 3.73 |
| Ptpn18   | A_55_P2069306 | 2.03 | 2.05 | 3.28 | 2.42 | 2.27 | 4.07 |
| Ptprc    | A_55_P1990324 | 2.05 | 1.66 | 2.05 | 2.00 | 2.14 | 2.48 |
| Pycard   | A_51_P438821  | 1.95 | 1.90 | 2.35 | 2.63 | 1.89 | 2.60 |
| Rac2     | A_51_P121891  | 2.06 | 1.83 | 2.43 | 2.47 | 3.52 | 2.40 |
| Rac2     | A_51_P121891  | 2.15 | 2.07 | 2.35 | 1.98 | 3.24 | 2.45 |
| Rac2     | A_51_P121891  | 2.08 | 2.12 | 2.46 | 1.98 | 2.52 | 2.58 |
| Rac2     | A_51_P121891  | 2.27 | 2.33 | 2.50 | 2.39 | 3.02 | 2.74 |
| Rac2     | A_51_P121891  | 2.05 | 2.02 | 2.45 | 2.24 | 2.70 | 2.51 |
| Rac2     | A_51_P121891  | 2.07 | 2.45 | 2.74 | 2.15 | 2.78 | 2.64 |
| Rac2     | A_51_P121891  | 2.24 | 2.15 | 2.38 | 2.08 | 3.16 | 2.38 |
| Rac2     | A_51_P121891  | 2.10 | 2.11 | 2.35 | 2.61 | 3.45 | 2.26 |
| Rac2     | A_51_P121891  | 1.94 | 2.43 | 2.39 | 2.15 | 2.56 | 2.60 |
| Rac2     | A_51_P121891  | 2.09 | 2.23 | 2.44 | 2.24 | 3.07 | 2.53 |
| Rasal3   | A_52_P16873   | 1.84 | 2.54 | 2.16 | 2.22 | 1.78 | 2.26 |
| Renbp    | A_55_P2013357 | 1.67 | 1.67 | 2.29 | 1.84 | 2.14 | 2.07 |
| Runx1    | A_51_P206585  | 1.64 | 1.51 | 1.71 | 1.35 | 1.04 | 2.02 |
| Runx1    | A_55_P2183438 | 1.14 | 1.14 | 1.48 | 1.52 | 1.79 | 1.67 |
| Samsn1   | A_55_P2010271 | 2.32 | 2.28 | 3.11 | 3.84 | 3.11 | 3.63 |
| Selplg   | A_55_P1976212 | 1.64 | 1.55 | 2.07 | 1.78 | 2.37 | 1.47 |
| Selplg   | A_51_P131358  | 2.13 | 1.91 | 2.05 | 2.01 | 1.95 | 1.81 |
| Serpinf2 | A_55_P1956497 | 1.90 | 2.32 | 3.41 | 2.60 | 4.81 | 7.43 |
| Sh3bp2   | A_55_P2042823 | 1.75 | 2.03 | 2.60 | 1.83 | 1.89 | 3.00 |
| Siglec5  | A_55_P2043277 | 2.10 | 2.27 | 1.95 | 1.81 | 1.54 | 2.71 |
| Slamf9   | A_51_P246066  | 4.57 | 4.97 | 4.47 | 4.22 | 3.55 | 4.60 |
| Slc11a1  | A_51_P186476  | 3.60 | 5.16 | 4.09 | 5.26 | 8.50 | 4.61 |
| Slc14a1  | A_51_P312336  | 1.92 | 2.54 | 3.06 | 1.67 | 1.92 | 2.81 |
| Slc15a3  | A_52_P467389  | 3.81 | 4.84 | 4.26 | 4.27 | 9.07 | 4.38 |
| Slc16a3  | A_55_P2067505 | 1.85 | 2.81 | 2.07 | 1.90 | 2.11 | 2.25 |
| Slc16a3  | A_55_P1959425 | 1.83 | 2.50 | 2.12 | 1.70 | 2.13 | 1.90 |
| Slc37a2  | A_55_P2350617 | 1.64 | 1.94 | 2.05 | 2.08 | 2.02 | 2.72 |
| Slc7a7   | A_51_P472249  | 1.67 | 1.62 | 2.11 | 2.35 | 1.81 | 2.15 |
| Slco2b1  | A_55_P2079009 | 1.71 | 1.86 | 1.83 | 1.97 | 1.94 | 2.47 |
| Slco2b1  | A_55_P2030155 | 1.46 | 1.75 | 1.94 | 1.63 | 2.25 | 2.10 |
| Snx20    | A_51_P309158  | 1.65 | 1.60 | 1.65 | 1.99 | 1.67 | 1.71 |
| Sp110    | A_55_P2152566 | 1.75 | 2.17 | 1.95 | 1.90 | 2.16 | 2.85 |
| Stard4   | A_52_P384574  | 1.63 | 1.47 | 1.87 | 1.89 | 1.57 | 2.23 |

|           |               |      |       |       |      |      |       |
|-----------|---------------|------|-------|-------|------|------|-------|
| Syngn1    | A_51_P270733  | 3.03 | 2.22  | 4.17  | 3.06 | 3.82 | 3.18  |
| Syt10     | A_51_P318830  | 7.28 | -3.34 | 2.47  | 3.89 | 2.15 | -2.29 |
| Tbxas1    | A_51_P448664  | 2.52 | 2.85  | 3.17  | 3.92 | 3.83 | 3.15  |
| Tcigr1    | A_51_P241861  | 1.51 | 1.75  | 1.86  | 1.68 | 2.06 | 1.46  |
| Tgfbr2    | A_55_P2107288 | 1.30 | 1.68  | 2.45  | 1.70 | 1.44 | 2.19  |
| Tgfbr2    | A_51_P450573  | 1.91 | 2.06  | 2.27  | 2.20 | 1.98 | 3.68  |
| Tgif1     | A_55_P2092526 | 1.71 | 1.77  | 2.28  | 2.15 | 1.74 | 3.65  |
| Timp2     | A_65_P12392   | 1.84 | 1.76  | 2.62  | 1.95 | 2.10 | 1.99  |
| Tlr1      | A_51_P495581  | 2.30 | 1.72  | 1.56  | 2.32 | 3.14 | 1.61  |
| Tlr2      | A_51_P452629  | 2.71 | 3.59  | 3.33  | 3.25 | 3.58 | 5.12  |
| Tlr2      | A_51_P452629  | 2.86 | 3.40  | 3.57  | 3.20 | 2.72 | 4.94  |
| Tlr2      | A_51_P452629  | 2.60 | 3.86  | 3.20  | 3.85 | 3.44 | 4.69  |
| Tlr2      | A_51_P452629  | 2.87 | 4.38  | 3.56  | 3.81 | 3.57 | 6.09  |
| Tlr2      | A_51_P452629  | 2.75 | 4.21  | 3.33  | 3.38 | 2.79 | 6.21  |
| Tlr2      | A_51_P452629  | 2.65 | 4.22  | 3.03  | 3.45 | 2.16 | 4.86  |
| Tlr2      | A_51_P452629  | 2.65 | 4.15  | 3.44  | 3.34 | 3.62 | 5.15  |
| Tlr2      | A_51_P452629  | 2.51 | 3.63  | 3.35  | 3.61 | 4.22 | 5.47  |
| Tlr2      | A_51_P452629  | 2.89 | 3.76  | 3.36  | 3.47 | 3.68 | 5.74  |
| Tlr2      | A_51_P452629  | 2.59 | 3.08  | 3.12  | 2.97 | 4.50 | 4.40  |
| Tlr7      | A_55_P2050932 | 1.34 | 1.41  | 1.48  | 1.81 | 1.43 | 1.41  |
| Tlr7      | A_55_P2129047 | 1.56 | 1.80  | 2.19  | 2.11 | 4.14 | 2.68  |
| Tlr12     | A_66_P114333  | 2.04 | 2.00  | 2.15  | 2.29 | 2.80 | 3.01  |
| Tlr13     | A_55_P2048279 | 1.91 | 1.89  | 2.32  | 2.29 | 1.96 | 2.91  |
| Tnfaip8l2 | A_51_P150678  | 1.66 | 2.15  | 2.35  | 1.77 | 1.49 | 2.67  |
| Tnfrsf1a  | A_52_P192426  | 1.36 | 1.69  | 1.98  | 1.38 | 1.60 | 2.73  |
| Tnfrsf1a  | A_52_P192426  | 1.42 | 1.83  | 2.15  | 1.59 | 1.90 | 2.92  |
| Tnfrsf1a  | A_52_P192426  | 1.45 | 2.01  | 2.32  | 1.68 | 1.65 | 3.38  |
| Tnfrsf1a  | A_52_P192426  | 1.46 | 1.73  | 2.18  | 1.48 | 1.37 | 3.19  |
| Tnfrsf1a  | A_52_P192426  | 1.53 | 1.82  | 2.24  | 1.68 | 1.66 | 3.04  |
| Tnfrsf1a  | A_52_P192426  | 1.35 | 2.03  | 2.34  | 1.56 | 2.22 | 3.30  |
| Tnfrsf1a  | A_52_P192426  | 1.48 | 1.97  | 2.24  | 1.47 | 1.74 | 3.09  |
| Tnfrsf1a  | A_55_P2051099 | 1.31 | 1.45  | 1.91  | 1.41 | 2.07 | 1.29  |
| Tnfrsf1a  | A_52_P192426  | 1.61 | 1.68  | 2.09  | 1.61 | 1.81 | 2.89  |
| Tnfrsf1a  | A_52_P192426  | 1.41 | 1.89  | 2.14  | 1.42 | 1.74 | 2.77  |
| Tnfrsf1a  | A_52_P192426  | 1.49 | 1.60  | 2.16  | 1.38 | 1.65 | 2.77  |
| Tnfsf8    | A_55_P2179463 | 1.87 | 1.56  | 2.44  | 2.58 | 1.48 | 2.92  |
| Tnni2     | A_55_P2040893 | 2.40 | 2.00  | 3.49  | 2.96 | 2.56 | 2.75  |
| Tox4      | A_55_P2121618 | 4.35 | -2.72 | 2.12  | 3.32 | 1.62 | -1.55 |
| Trem2     | A_55_P1962937 | 7.05 | 4.23  | 10.78 | 9.00 | 5.53 | 11.92 |
| Tubb6     | A_51_P421140  | 1.62 | 1.67  | 1.54  | 1.78 | 1.74 | 3.02  |
| Tyrobp    | A_51_P261517  | 5.82 | 6.44  | 6.40  | 5.74 | 5.11 | 7.24  |
| Ucp2      | A_51_P297105  | 1.91 | 1.60  | 2.58  | 1.84 | 2.79 | 1.75  |
| Ucp3      | A_66_P108247  | 2.18 | 1.84  | 2.29  | 1.69 | 2.68 | 2.00  |
| Unc93b1   | A_52_P507382  | 2.42 | 1.78  | 2.50  | 2.20 | 1.98 | 2.42  |
| Vav1      | A_51_P154780  | 1.66 | 1.92  | 1.77  | 1.98 | 1.48 | 2.04  |
| Vav1      | A_55_P2036567 | 2.02 | 1.96  | 2.64  | 2.59 | 1.75 | 3.71  |

|       |              |      |      |      |      |      |      |
|-------|--------------|------|------|------|------|------|------|
| Vim   | A_51_P392687 | 1.58 | 1.64 | 2.69 | 1.59 | 2.03 | 4.63 |
| Was   | A_51_P327121 | 1.67 | 1.57 | 1.64 | 2.20 | 2.76 | 1.79 |
| Wdfy4 | A_52_P199614 | 1.65 | 1.58 | 1.87 | 2.02 | 2.07 | 3.00 |
